# Supplementary material for: Study protocol for the TRUSt trial: a pragmatic randomised controlled trial comparing the standard of care with a transitional pain service for patients at risk of chronic postsurgical pain undergoing surgery
Source: HighWire-hosted journal article supplement (doi:10.1136/bmjopen-2021-049676), 2021-08-01
Supplement: bmjopen-2021-049676supp003_data_supplement.pdf [file bmjopen-2021-049676supp003_data_supplement.pdf]

# Proefpersoneninformatie voor deelname aan medisch-wetenschappelijk onderzoek

## Beter herstel na een operatie met een Transitionele Pijn Service

*Een Transitionele Pijn Service rondom een operatie voor patiënten met een hoger risico op langdurige postoperatieve chronische pijn*

### Inleiding

Geachte heer/mevrouw,

Met deze informatiebrief willen we u vragen of u wilt meedoen aan medisch-wetenschappelijk onderzoek. Meedoen is vrijwillig. U krijgt deze brief omdat u binnenkort een chirurgische ingreep ondergaat of recentelijk ondergaan heeft.

U leest hier om wat voor onderzoek het gaat, wat het voor u betekent, en wat de voordelen en nadelen zijn. Het is veel informatie. Wilt u de informatie doorlezen en beslissen of u wilt meedoen?

### Stel uw vragen

U kunt uw beslissing nemen met de informatie die u in deze informatiebrief vindt. Daarnaast raden we u aan om dit te doen:

- Stel vragen aan de onderzoeker die u deze informatie geeft.
- Praat met uw partner, familie of vrienden over dit onderzoek.
- Stel vragen aan de onafhankelijk deskundige, dr. M.F. Stevens
- Lees de informatie op [www.rijksoverheid.nl/mensenonderzoek](http://www.rijksoverheid.nl/mensenonderzoek).

## 1. Algemene informatie

Amsterdam Universitair Medisch Centrum, locatie AMC heeft dit onderzoek opgezet. Hieronder noemen we Amsterdam Universitair Medisch Centrum, locatie AMC steeds de 'opdrachtgever'. Onderzoekers, dit kunnen artsen/onderzoeksverpleegkundigen/onderzoekers zijn voeren dit onderzoek uit. Voor dit onderzoek zijn 180 proefpersonen nodig. De medische-ethische toetsingscommissie AMC heeft dit onderzoek goedgekeurd.

## 2. Wat is het doel van het onderzoek?

Met de oprichting van een Transitionele Pijn Service (TPS) willen wij onderzoeken of patiënten hierdoor sneller herstellen van een operatie, minder vaak chronisch postoperatieve pijn ontwikkelen en daarnaast minder opiaten gebruiken (een voorbeeld van een opiaat is morfine). Het is de bedoeling de resultaten te publiceren en op deze manier betere zorg te kunnen leveren.

### 3. Wat is de achtergrond van het onderzoek?

Chronisch postoperatieve pijn is een complicatie die ongeveer na 10% van de operaties optreedt. Helaas wordt de kwaliteit van leven door deze aandoening vaak negatief beïnvloedt. Daarnaast is deze aandoening ook moeilijk te behandelen.

Tevens is het opiaatgebruik in Nederland de laatste jaren toegenomen. Dit heeft vele negatieve gevolgen zoals een toename in opiaatafhankelijkheid, meer ziekenhuisopnames en een hogere sterftkans.

Chronisch pijn patiënten gebruiken vaak een hogere dosis opiaten, dan patiënten zonder chronisch pijn, met alle negatieve gevolgen van dien. Wij willen een TPS oprichten, die patiënten met een verhoogd risico op postoperatieve pijn opspoorst en intensief begeleidt rondom en na de operatie. Wij denken dat er hierdoor minder chronische postoperatieve pijn ontstaat en er ook minder opiaatgebruik na de operatie zal zijn. In Canada is dit recent gedaan en daarbij zijn goede resultaten zijn behaald.

### 4. Hoe verloopt het onderzoek?

#### *Duur onderzoek:*

Als u meedoet, duurt dat totaal ongeveer 6 maanden voor u.

Voor de studie maken wij 2 groepen (Een Transitionele Pijn Service groep en een standaard zorg groep), met ieder 90 patiënten.

#### *De behandeling:*

Nadat u heeft besloten mee te doen wordt er geloot tussen de behandeling van een TPS team of de normale zorg in de controle groep. Deze loting vindt plaats met behulp van een computer programma en de onderzoekers weten vooraf niet welke groep u zult komen.

De patiënten in de controle groep krijgen de standaard zorg rondom een operatie.

De patiënten in de Transitionele Pijn Service groep krijgen ook de standaard zorg, maar daarbij extra behandeling van het Transitionele Pijn Service-team. Het Transitionele Pijn Service-team bestaat uit diverse pijn-gespecialiseerde anesthesisten, -verpleegkundigen, psychologen en fysiotherapeuten die samen een individueel pijnbeleid omtrent de operatie zullen maken.

#### *Vragenlijsten:*

Van alle proefpersonen wordt gevraagd diverse vragenlijsten in te vullen. Dit zal indien mogelijk, vooraf aan de operatie zijn, net als op dag 1, 2 en 3 na de operatie en na 3 en 6 maanden. Dit kan zowel digitaal, of als u dit liever hebt per post. U hoeft hiervoor niet extra naar het ziekenhuis te komen. De vragen gaan over herstel na de operatie, eventuele pijn en psychische klachten.

De onderzoeker zal deze gegevens verzamelen. Daarnaast zal de onderzoeker gegevens verzamelen uit uw medisch dossier over uw gezondheidstoestand.

## 5. Welke afspraken maken we met u?

Om het onderzoek goed te laten verlopen, is het belangrijk dat u zich aan de volgende afspraken houdt.

De afspraken zijn dat u:

- afspraken voor bezoeken nakomt.

Het is belangrijk dat u contact opneemt met de onderzoeker:

- voordat u andere geneesmiddelen gaat gebruiken. Ook als dat homeopathische geneesmiddelen, natuurgeneesmiddelen, vitaminen en/of geneesmiddelen van de drogist zijn.
- als u in een ziekenhuis wordt opgenomen of behandeld.
- als u plotseling gezondheidsklachten krijgt.
- als u niet meer wilt meedoen aan het onderzoek.
- als uw contactgegevens wijzigen.

## 6. Van welke bijwerkingen, nadelige effecten of ongemakken kunt u last krijgen?

Behandeling van het Transitionele Pijn Service-team heeft geen nadelige effecten.

## 7. Wat zijn de voordelen en de nadelen als u meedoet aan het onderzoek?

Het is belangrijk dat u de mogelijke voor- en nadelen goed afweegt voordat u besluit mee te doen. Als u in de in de groep wordt geplaatst waarbij het Transitionele Pijn Service-team u begeleidt kan dit mogelijk leiden tot een beter herstel na de operatie en minder opiatengebruik. Daarnaast draagt u bij aan meer kennis over de behandeling van pijn. Een nadeel van dit onderzoek kan zijn dat u extra tijd kwijt bent aan het invullen van vragenlijsten en afspraken waaraan u zich moet houden.

Voor deze studie zijn er geen extra bezoeken naar het AMC nodig en dus zullen reiskosten ook niet worden vergoed.

## 8. Wanneer stopt het onderzoek?

De onderzoeker laat het u weten als er nieuwe informatie over het onderzoek komt die belangrijk voor u is. De onderzoeker vraagt u daarna of u blijft meedoen.

In deze situaties stopt voor u het onderzoek:

- Er 6 maanden na de operatie contact met u is opgenomen / de laatste vragenlijsten zijn ingevuld
- U wilt zelf stoppen met het onderzoek. Dat mag op ieder moment. Meld dit dan meteen bij de onderzoeker. U hoeft er niet bij te vertellen waarom u stopt. U krijgt dan weer de gewone behandeling rondom een operatie.

- De onderzoeker vindt het beter voor u om te stoppen. De onderzoeker zal u nog wel uitnodigen voor een nacontrole.
- het Amsterdam UMC, de overheid of de beoordelende medisch-ethische toetsingscommissie, besluit om het onderzoek te stoppen.

*Wat gebeurt er als u stopt met het onderzoek?*

De onderzoekers gebruiken de data die tot het moment van stoppen zijn verzameld. Geef dit door aan de onderzoeker.

Het hele onderzoek is afgelopen als alle deelnemers klaar zijn.

## **9. Wat gebeurt er na het onderzoek?**

*Indien u na het onderzoek klachten van chronische pijn blijft houden of een andere indicatie heeft, kunt u verwezen worden naar een chronisch pijnspecialist voor verdere behandeling.*

De onderzoeker bespreekt dit met u.

*Krijgt u de resultaten van het onderzoek?*

Ongeveer een tot drie jaar na uw deelname laat de onderzoeker u weten wat de belangrijkste uitkomsten zijn van het onderzoek. Deze informatie krijgt u per email toegezonden. Wilt u dit niet weten? Zeg dat dan tegen de onderzoeker. Hij zal het u dan niet vertellen.

## **10. Wat doen we met uw gegevens**

Doet u mee met het onderzoek? Dan geeft u ook toestemming om uw gegevens te verzamelen, gebruiken en bewaren.

*Welke gegevens bewaren we?*

We bewaren deze gegevens:

- uw naam
- Uw emailadres
- uw geslacht
- uw geboortedatum
- gegevens over uw gezondheid
- (medische) gegevens die we tijdens het onderzoek verzamelen

*Waarom verzamelen, gebruiken en bewaren we uw gegevens?*

We verzamelen, gebruiken en bewaren uw gegevens om de vragen van dit onderzoek te kunnen beantwoorden. En om de resultaten te kunnen publiceren.

*Hoe beschermen we uw privacy?*

Om uw privacy te beschermen geven wij uw gegevens een code. Op al uw gegevens zetten we alleen deze code. De sleutel van de code bewaren we op een beveiligde plek in het

ziekenhuis. Als we uw gegevens verwerken, gebruiken we steeds alleen die code. Ook in rapporten en publicaties over het onderzoek kan niemand terughalen dat het over u ging.

#### *Wie kunnen uw gegevens zien?*

Sommige personen kunnen wel uw naam en andere persoonlijke gegevens zonder code inzien. Dit zijn mensen die controleren of de onderzoekers het onderzoek goed en betrouwbaar uitvoeren. Deze personen kunnen bij uw gegevens komen:

- Een monitor die voor de opdrachtgever werkt.
- Inspectie Gezondheidszorg en Jeugd

Deze personen houden uw gegevens geheim. Wij vragen u voor deze inzage toestemming te geven.

#### *Hoelang bewaren we uw gegevens?*

We bewaren uw gegevens 15 jaar in het ziekenhuis.

#### *Kunt u uw toestemming voor het gebruik van uw gegevens weer intrekken?*

U kunt uw toestemming voor het gebruik van uw gegevens op ieder moment intrekken. Maar let op: trekt u uw toestemming in, en hebben onderzoekers dan al gegevens verzameld voor een onderzoek? Dan mogen zij deze gegevens nog wel gebruiken.

#### *Wilt u meer weten over uw privacy?*

- Wilt u meer weten over uw rechten bij de verwerking van persoonsgegevens? Kijk dan op [www.autoriteitpersoonsgegevens.nl](http://www.autoriteitpersoonsgegevens.nl).
- Heeft u vragen over uw rechten? Of heeft u een klacht over de verwerking van uw persoonsgegevens? Neem dan contact op met degene die verantwoordelijk is voor de verwerking van uw persoonsgegevens. Zie bijlage A voor contactgegevens, en website.
- Het AMC is verantwoordelijk voor de verwerking van de persoonsgegevens. Als u klachten heeft over de verwerking van uw persoonsgegevens, raden we u aan om deze eerst te bespreken met het onderzoeksteam. U kunt ook naar de Functionaris Gegevensbescherming van het AMC gaan (paragraaf 13). Of u dient een klacht in bij de Autoriteit Persoonsgegevens.

#### *Waar vindt u meer informatie over het onderzoek?*

Op de volgende website(s) vindt u meer informatie over het onderzoek. [www.trialregister.nl](http://www.trialregister.nl)

Na het onderzoek kan de website een samenvatting van de resultaten van dit onderzoek tonen. U vindt het onderzoek door te zoeken op TRUSt.

## **11. Krijgt u een vergoeding als u meedoet aan het onderzoek?**

De behandeling tijdens het onderzoek kost u niets. U krijgt ook geen vergoeding als u meedoet aan dit onderzoek.

## **12. Bent u verzekerd tijdens het onderzoek?**

U bent niet extra verzekerd voor dit onderzoek. Want als u meedoet aan het onderzoek, heeft u dezelfde risico's als bij de gewone behandeling van uw aandoening. Daarom hoeft de onderzoeker van de Medisch Ethische Toetsingscommissie AMC geen extra verzekering af te sluiten.

## **13. We informeren uw huisarts en behandelend specialist.**

Wij stellen altijd uw behandelend anesthesioloog op de hoogte van uw deelname aan het onderzoek. Indien u in de TPS groep bent geloot kan uw huisarts worden geïnformeerd omtrent verdere behandeling/adviezen of overleg.

## **14. Heeft u vragen?**

Vragen over het onderzoek kunt u stellen aan het onderzoeksteam. Wilt u advies van iemand die er geen belang bij heeft? Ga dan naar dr. M.F. Stevens. Hij weet veel over het onderzoek, maar werkt niet mee aan dit onderzoek.

Heeft u een klacht? Bespreek dit dan met de onderzoeker of de arts die u behandelt. Wilt u dit liever niet? Ga dan naar de klachtencommissie van het Amsterdam UMC. In bijlage A staat waar u die kunt vinden.

## **15. Hoe geeft u toestemming voor het onderzoek?**

U kunt eerst rustig nadenken over dit onderzoek. Daarna vertelt u de onderzoeker of u de informatie begrijpt en of u wel of niet wilt meedoen. Wilt u meedoen? Dan vult u het toestemmingsformulier in dat u bij deze informatiebrief vindt. U en de onderzoeker krijgen allebei een getekende versie van deze toestemmingsverklaring.

Dank voor uw tijd.

## 16. Bijlagen bij deze informatie

- A. Contactgegevens Amsterdam UMC, locatie AMC

## **Bijlage A: contactgegevens voor Amsterdam UMC Locatie AMC**

### Uitvoerend onderzoeker:

M. Admiraal

Amsterdam UMC, Universiteit van Amsterdam

Meibergdreef 9, 1105 AZ Amsterdam

020-5669111 / toestel 29370

m.admiraal1@amsterdamumc.nl

### Hoofdonderzoekers:

Prof. dr. dr. Markus W. Hollmann, Anesthesioloog

Afdeling Anesthesiologie, Amsterdam UMC locatie AMC

Meibergdreef 9, H1-132

1105AZ Amsterdam, The Netherlands

Tel. 020 566 3630

### Onafhankelijk arts:

Dr. M.F. Stevens, anesthesioloog

Amsterdam UMC, Universiteit van Amsterdam

Meibergdreef 9, 1105 AZ Amsterdam

020-5665815 / toestel 29452

m.f.stevens@amsterdamumc.nl

**Klachten:** Klachtenfunctionaris Amsterdam UMC locatie AMC

Tel. 020 566 3355

Bereikbaarheid: werkdagen, 9.00 tot 15.30 uur

### **Functionaris voor de Gegevensbescherming van de instelling:**

Mw. M. Inge

Amsterdam UMC, Universiteit van Amsterdam

Meibergdreef 9, 1105 AZ Amsterdam

Tel. 020 566 2015

fg@amc.nl

Bereikbaarheid: ma t/m do, 8.55 tot 17.00 uur



## Bijlage B: toestemmingsformulier proefpersoon

Behorende bij

*Een Transitionele Pijn Service voor patiënten met een groot risico op postoperatief chronische pijn die een operatie ondergaan*

- Ik heb de informatiebrief gelezen. Ook kon ik vragen stellen. Mijn vragen zijn goed genoeg beantwoord. Ik had genoeg tijd om te beslissen of ik meedoe.
- Ik weet dat meedoen vrijwillig is. Ook weet ik dat ik op ieder moment kan beslissen om toch niet mee te doen met het onderzoek. Of om ermee te stoppen. Ik hoef dan niet te zeggen waarom ik wil stoppen.
- Ik geef de onderzoeker toestemming om mijn huisarts en behandelend specialist te laten weten dat ik meedoe aan dit onderzoek.
- Ik geef de onderzoeker toestemming om informatie op te vragen bij mijn huisarts/specialist(en) die mij behandelen over mijn voorgeschiedenis.
- Ik geef de onderzoekers toestemming om mijn gegevens te verzamelen en gebruiken. De onderzoekers doen dit alleen om de onderzoeksvraag van dit onderzoek te beantwoorden.
- Ik weet dat voor de controle van het onderzoek sommige mensen al mijn gegevens kunnen inzien. Die mensen staan in deze informatiebrief. Ik geef deze mensen toestemming om mijn gegevens in te zien voor deze controle.
- Ik wil meedoen aan dit onderzoek.

Mijn naam is (proefpersoon): .....

Handtekening: .....

Datum : \_\_ / \_\_ / \_\_

-----  
Ik verklaar dat ik deze proefpersoon volledig heb geïnformeerd over het genoemde onderzoek.

Wordt er tijdens het onderzoek informatie bekend die de toestemming van de proefpersoon kan beïnvloeden? Dan laat ik dit op tijd weten aan deze proefpersoon.

Naam onderzoeker (of diens vertegenwoordiger):.....

Handtekening:.....

Datum: \_\_ / \_\_ / \_\_

*De proefpersoon krijgt een volledige informatiebrief mee, samen met een getekende versie van het toestemmingsformulier.*
