# Supplementary material for: Study protocol for the TRUSt trial: a pragmatic randomised controlled trial comparing the standard of care with a transitional pain service for patients at risk of chronic postsurgical pain undergoing surgery
Source: HighWire-hosted journal article supplement (doi:10.1136/bmjopen-2021-049676), 2021-08-01
Supplement: bmjopen-2021-049676supp005_data_supplement.pdf [file bmjopen-2021-049676supp005_data_supplement.pdf]

**Appendix 5: Protocol date and version identifier**

Issue date: 25 January 2021

Protocol amendment number: 3.2

**Revision chronology:**

- Protocol version 3.2, 25-01-2021: approved.  
*At postoperative day one and two patients have to fill in the QoR-15 questionnaire.*
- Protocol version 3.1, 26-11-202: approved.  
*Different informed consent procedure necessary due to COVID-19.*
- Protocol version 2.0, 15-10-2020: Ethics approval was obtained by the accredited medical research ethics committee of the Academic Medical Center (AMC) in Amsterdam (2020\_211)  
*All the proposals and recommendations put forward by the ethics committee have been followed and integrated into the amended version of the protocol.*
- Protocol version 1.0, 04-09-2020 sent to medical research ethics committee of the Academic Medical Center (AMC) in Amsterdam.
